# Supplementary material for: Improvement of the Li-ion conductivity and air stability of the Ta-doped Li7La3Zr2O12 electrolyte via Ga co-doping and its application in Li–S batteries
Source: Royal Society of Chemistry journal article supplement (doi:10.1039/d3ta06229e), 2023-12-27
Supplement: d3ta06229e1.pdf [file d3ta06229e1.pdf]

---

Improvement of Li-ion conductivity and air stability of Ta-doped  $\text{Li}_7\text{La}_3\text{Zr}_2\text{O}_{12}$  electrolyte via Ga co-doping and its application in Li-S battery

*Kai Ma<sup>a,b</sup>, Bowen Chen<sup>b</sup>, Cheng-Xin Li<sup>\*a</sup>, and Venkataraman Thangadurai<sup>\*b</sup>*

<sup>a</sup>State Key Laboratory for Mechanical Behavior of Materials, School of Materials Science and Engineering, Xi'an Jiaotong University, Xi'an, Shaanxi, 710049, P.R. China

<sup>b</sup>Department of Chemistry, University of Calgary, 2500 University Drive NW, Calgary, Alberta T2N 1N4, Canada

Table S 1 Elemental analysis of  $\text{Ga}_x\text{-LLZT}$  ( $0 \leq x \leq 0.2$ )

| Ga <sub>x</sub> -LLZT | Molar ratio of the elements |       |    |       |       |
|-----------------------|-----------------------------|-------|----|-------|-------|
|                       | Li                          | Ga    | La | Zr    | Ta    |
| LLZT                  | 6.834                       | -     | 3  | 1.592 | 0.425 |
| Ga0.05-LLZT           | 6.619                       | 0.045 | 3  | 1.613 | 0.397 |
| Ga0.1-LLZT            | 6.462                       | 0.118 | 3  | 1.624 | 0.391 |
| Ga0.15-LLZT           | 6.242                       | 0.159 | 3  | 1.591 | 0.419 |
| Ga0.2-LLZT            | 6.134                       | 0.222 | 3  | 1.625 | 0.391 |

Table S 2 Rietveld refinement results for Gax-LLZT ( $0 \leq x \leq 0.2$ )

|                                     | $x = 0$    | $x = 0.05$    | $x = 0.1$    | $x = 0.15$   | $x = 0.2$     |
|-------------------------------------|------------|---------------|--------------|--------------|---------------|
| La (24c) occupancy                  | 1          | 1             | 1            | 1            | 1             |
| $x$                                 | 1/8        | 1/8           | 1/8          | 1/8          | 1/8           |
| $y$                                 | 0          | 0             | 0            | 0            | 0             |
| $z$                                 | 1/4        | 1/4           | 1/4          | 1/4          | 1/4           |
| $U_{eq}$                            | 0.004(5)   | 0.012(2)      | 0.014(2)     | 0.008(2)     | 0.0115(18)    |
| Zr/Ta (16a) occupancy               | 0.8/0.2    | 0.8/0.2       | 0.8/0.2      | 0.8/0.2      | 0.8/0.2       |
| $x$                                 | 0          | 0             | 0            | 0            | 0             |
| $y$                                 | 0          | 0             | 0            | 0            | 0             |
| $z$                                 | 0          | 0             | 0            | 0            | 0             |
| $U_{eq}$                            | 0.0014(5)  | 0.0082(15)    | 0.0124(15)   | 0.0070(14)   | 0.0084(13)    |
| Li1/Ga occupancy (24d)              | 0.42(10)/0 | 0.37(6)/0.017 | 0.3(4)/0.033 | 0.15(7)/0.05 | 0.08(2)/0.067 |
| $x$                                 | 3/8        | 3/8           | 3/8          | 3/8          | 3/8           |
| $y$                                 | 0          | 0             | 0            | 0            | 0             |
| $z$                                 | 1/4        | 1/4           | 1/4          | 1/4          | 1/4           |
| $U_{eq}$                            | 0.0003(4)  | 0.083(10)     | 0.02(3)      | 0.052(6)     | 0.027(11)     |
| Li2 (96h) occupancy                 | 0.44(2)    | 0.444(16)     | 0.46(10)     | 0.474(17)    | 0.483(6)      |
| $x$                                 | 0.665(7)   | 0.686(12)     | 0.683(6)     | 0.662(6)     | 0.688(4)      |
| $y$                                 | 0.612(12)  | 0.583(2)      | 0.50(2)      | 0.649(5)     | 0.545(8)      |
| $z$                                 | 0.090(4)   | 0.137(9)      | 0.140(15)    | 0.087(3)     | 0.102(5)      |
| $U_{eq}$                            | 0.019(4)   | 0.019(10)     | 0.050(13)    | 0.076(5)     | 0.03(6)       |
| O (96h) occupancy                   | 1          | 1             | 1            | 1            | 1             |
| $x$                                 | 0.1014(7)  | 0.1014(7)     | 0.1023(12)   | 0.1007(7)    | 0.1038(8)     |
| $y$                                 | 0.1954(7)  | 0.1948(6)     | 0.1938(7)    | 0.1960(6)    | 0.1960(6)     |
| $z$                                 | 0.2809(6)  | 0.2807(5)     | 0.2782(8)    | 0.2796(5)    | 0.2805(6)     |
| $U_{eq}$                            | 0.0031(5)  | 0.022(10)     | 0.029(12)    | 0.015(14)    | 0.009(9)      |
| $a$ (Å)                             | 12.9489(5) | 12.9475(4)    | 12.9471(6)   | 12.9468(4)   | 12.9464(7)    |
| $\rho_{calc}$ (g·cm <sup>-3</sup> ) | 5.341      | 5.361         | 5.368        | 5.382        | 5.404         |
| $R_p$ (%)                           | 5.44       | 6.09          | 6.66         | 6.47         | 5.98          |
| $R_{wp}$ (%)                        | 7.08       | 8.03          | 8.85         | 8.53         | 7.69          |
| $\chi^2$                            | 1.51       | 2.01          | 2.07         | 2.09         | 1.77          |

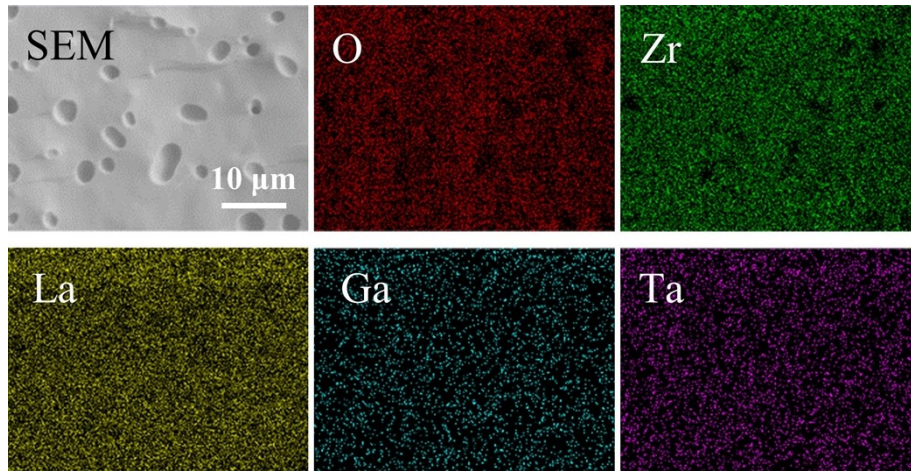

Fig. S 1 EDS element mappings of Ga<sub>0.1</sub>-LLZT sample

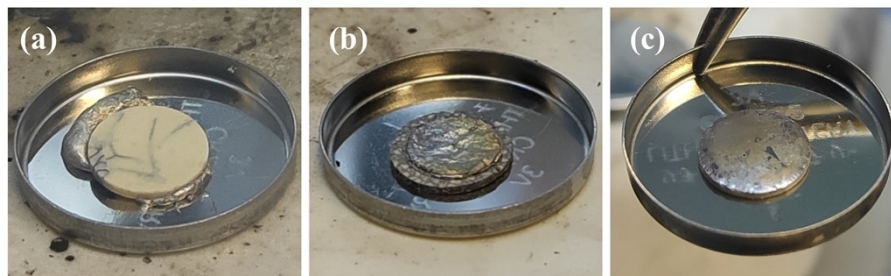

Fig. S 2 Photos of the (a) Ga<sub>0.1</sub>-LLZT and (b) Ga<sub>0.2</sub>-LLZT ceramics sintered at 1150 °C) after contact with molten Li. (c) Photo of Ga<sub>0.1</sub>-LLZT ceramic sintered at 1050 °C well bonded to molten Li.

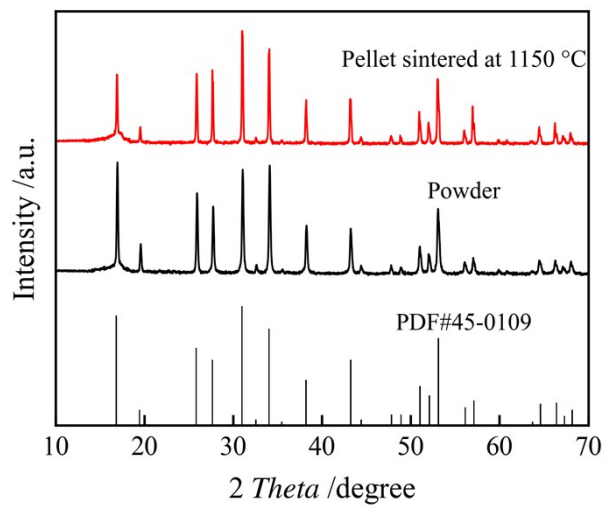

Fig. S 3 XRD patterns of Ga<sub>0.2</sub>-LLZT powder and pellet sintered at 1150 °C.

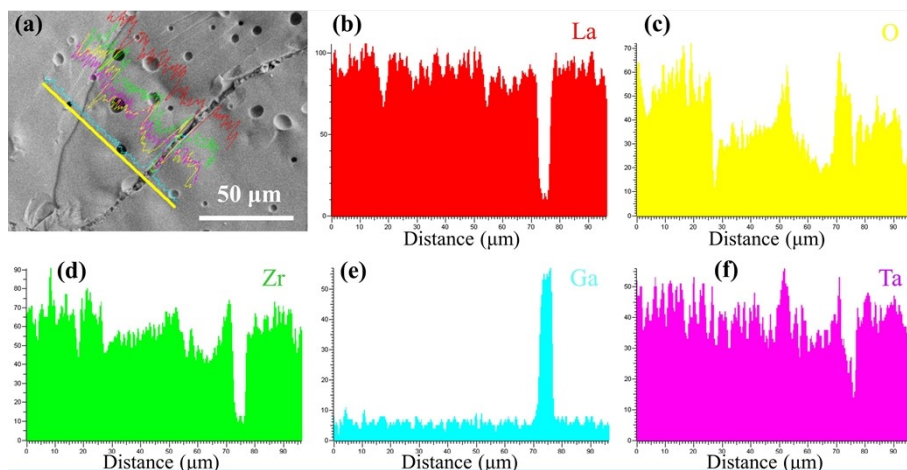

Fig. S 4 SEM image and (b-f) elements line distribution near grain boundary of Ga<sub>0.1</sub>-LLZT ceramic sintered at 1150 °C.

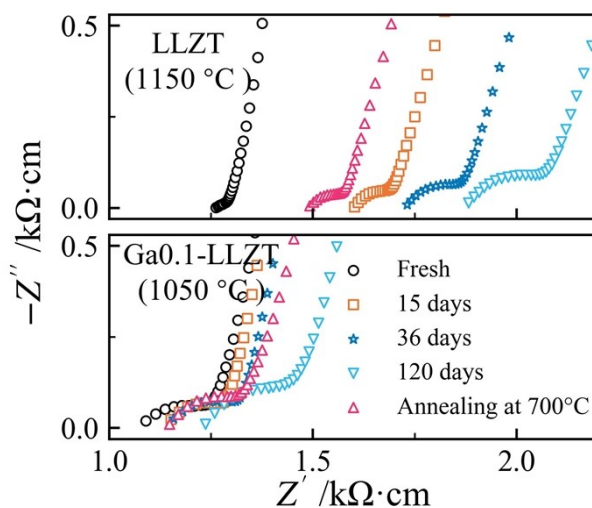

Fig. S 5 Nyquist plots of LLZT (1150 °C) and Ga<sub>0.1</sub>-LLZT (1050 °C) over atmospheric exposure time

Table S 3 Ionic conductivity of LLZT (1150 °C) and Ga<sub>0.1</sub>-LLZT (1050 °C) before and after the exposure to the ambient air

|                                   | Fresh ( $10^{-4}$ S·cm <sup>-1</sup> ) | 120 days ( $10^{-4}$ S·cm <sup>-1</sup> ) | 120 days + Annealing ( $10^{-4}$ S·cm <sup>-1</sup> ) |
|-----------------------------------|----------------------------------------|-------------------------------------------|-------------------------------------------------------|
| LLZT (1150 °C)                    | 7.75                                   | 4.74 (61%)                                | 6.06 (78%)                                            |
| Ga <sub>0.1</sub> -LLZT (1050 °C) | 8.05                                   | 6.94 (86%)                                | 7.60 (94%)                                            |

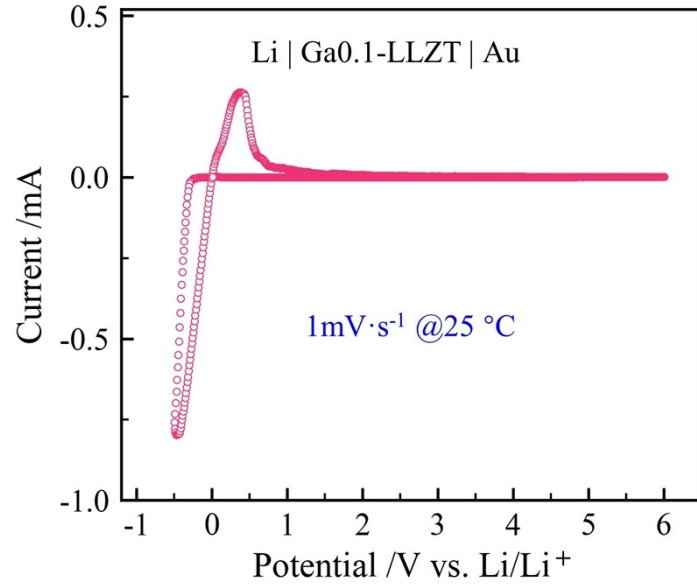

Fig. S 6 Cyclic voltammogram of Li|Ga0.1-LLZT (1150 °C)|Au cell.

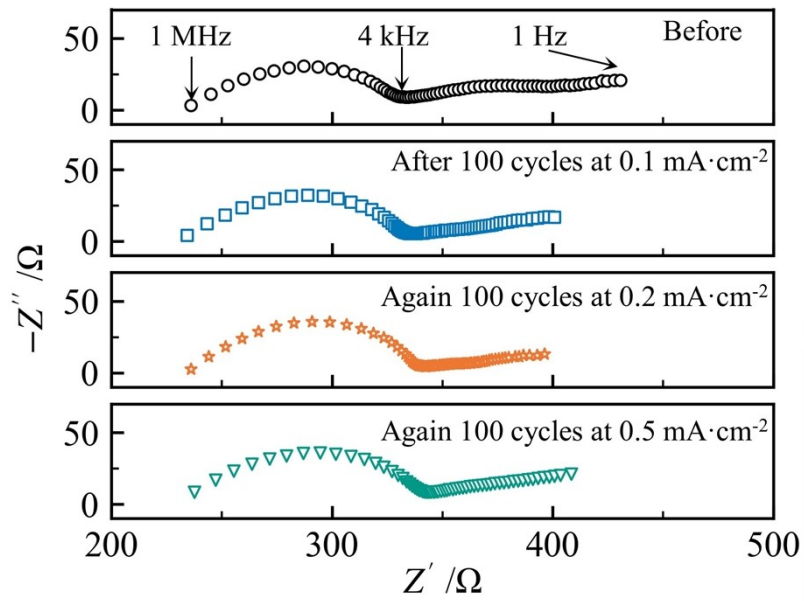

Fig. S 7 Electrochemical impedance plots of Li|Ga0.1-LLZT|Li symmetry cell
